# Supplementary material
Source: ML conference proceedings conference paper supplement (https://openreview.net/forum?id=_qNOyREqUo4)
Supplement: supplementary_material [file attachment]

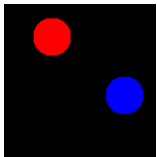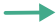

Conv2D(16, 9)

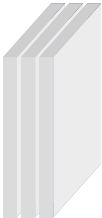

Conv2D(32, 9)

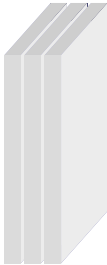

Conv2D(64, 9)

Split + Flatten

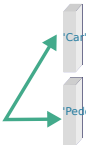

Dense(96) + Dense(48) + Dense(2)

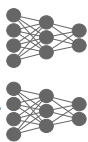

Mean  
regressor

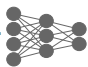

Mean  
regressor

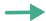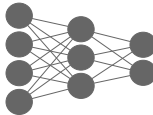

Variance  
regressor

Dense(64) + Dense(32) + Dense(1)
