# Supplementary material
Source: ML conference proceedings conference paper supplement (https://openreview.net/forum?id=_qNOyREqUo4)
Supplement: supplementary_material [file attachment]

8
